# Supplementary material
Source: PubMed Central journal article supplement (PMC5581668)
Supplement: NIHMS881812-supplement-1.pdf [file NIHMS881812-supplement-1.pdf]

## SUPPLEMENTALS

**Supplemental Table 1. 54 gene panel (N = 40 patients):** identifies potential tumor-related genomic alterations within 54 cancer-related genes including amplifications in *ERBB2*, *EGFR*, and *MET*. Only non-synonymous alterations were analyzed.

| <b>GENES WITH COMPLETE EXON COVERAGE</b> |                    |                     |               |                                                             |               |
|------------------------------------------|--------------------|---------------------|---------------|-------------------------------------------------------------|---------------|
| <i>ALK</i>                               | <i>APC</i>         | <i>AR</i>           | <i>BRAF</i>   | 18 GENES<br><b>3 Copy Number<br/>Variations in<br/>BOLD</b> |               |
| <i>CDKN2A</i>                            | <b><i>EGFR</i></b> | <b><i>ERBB2</i></b> | <i>FBXW7</i>  |                                                             |               |
| <i>KRAS</i>                              | <b><i>MET</i></b>  | <i>MYC</i>          | <i>NOTCH1</i> |                                                             |               |
| <i>NRAS</i>                              | <i>PIK3CA</i>      | <i>PTEN</i>         | <i>PROC</i>   |                                                             |               |
| <i>RB1</i>                               | <i>TP53</i>        |                     |               |                                                             |               |
| <b>GENES WITH CRITICAL EXON COVERAGE</b> |                    |                     |               |                                                             |               |
| 36 GENES                                 |                    |                     |               |                                                             |               |
| <i>ABL1</i>                              | <i>AKT1</i>        | <i>ATM</i>          | <i>CDH1</i>   | <i>CSF1R</i>                                                | <i>CTNNB1</i> |
| <i>ERBB4</i>                             | <i>EZH2</i>        | <i>FGFR1</i>        | <i>FGFR2</i>  | <i>FGFR3</i>                                                | <i>FLT3</i>   |
| <i>GNA11</i>                             | <i>GNAQ</i>        | <i>GNAS</i>         | <i>HNF1A</i>  | <i>HRAS</i>                                                 | <i>IDH1</i>   |
| <i>IDH2</i>                              | <i>JAK2</i>        | <i>JAK3</i>         | <i>KDR</i>    | <i>KIT</i>                                                  | <i>MLH1</i>   |
| <i>MPL</i>                               | <i>NPM1</i>        | <i>PDGFRA</i>       | <i>PTPN11</i> | <i>RET</i>                                                  | <i>SMAD4</i>  |
| <i>SMARCB1</i>                           | <i>SMO</i>         | <i>SRC</i>          | <i>STK11</i>  | <i>TERT</i>                                                 | <i>VHL</i>    |

**Supplemental Table 2. 68 gene panel (N = 47 patients)**, comprising amplifications in 16 genes as well as some fusions and indels. Only non-synonymous alterations were analyzed.

| POINT MUTATIONS<br>(68 genes) |               |               |               | AMPLIFI-<br>CATIONS<br>(16 genes)                | FUSIONS<br>(4 genes) | INDELS<br>(1 gene)             |
|-------------------------------|---------------|---------------|---------------|--------------------------------------------------|----------------------|--------------------------------|
| <i>AKT1</i>                   | <i>ALK</i>    | <i>APC</i>    | <i>AR</i>     | <i>AR</i>                                        | <i>ALK</i>           | <i>EGFR</i> exon 19 deletions  |
| <i>AFAR</i>                   | <i>ARID1A</i> | <i>ATM</i>    | <i>BRAF</i>   | <i>BRAF</i>                                      | <i>RET</i>           | <i>EGFR</i> exon 20 insertions |
| <i>BRCA1</i>                  | <i>BRCA2</i>  | <i>CCDN1</i>  | <i>CCDN2</i>  | <i>CCNE1</i>                                     | <i>ROS1</i>          |                                |
| <i>CCNE1</i>                  | <i>CDH1</i>   | <i>CDK4</i>   | <i>CDK6</i>   | <i>CDK4</i>                                      | <i>NTRK1</i>         |                                |
| <i>CDKN2A</i>                 | <i>CDKN2B</i> | <i>CTNNB1</i> | <i>EGFR</i>   | <i>CDK6</i>                                      |                      |                                |
| <i>ERBB2</i>                  | <i>ESR1</i>   | <i>EZH2</i>   | <i>FBXW7</i>  | <i>EGFR</i>                                      |                      |                                |
| <i>FGFR1</i>                  | <i>FGFR2</i>  | <i>FGFR3</i>  | <i>GATA3</i>  | <i>ERBB2</i>                                     |                      |                                |
| <i>GNA11</i>                  | <i>GNAQ</i>   | <i>GNAS</i>   | <i>HNF1A</i>  | <i>FGFR1</i>                                     |                      |                                |
| <i>HRAS</i>                   | <i>IDH1</i>   | <i>IDH2</i>   | <i>JAK2</i>   | <i>FGFR2</i>                                     |                      |                                |
| <i>JAK3</i>                   | <i>KIT</i>    | <i>KRAS</i>   | <i>MAP2K1</i> | <i>KIT</i>                                       |                      |                                |
| <i>MAP2K2</i>                 | <i>MET</i>    | <i>MLH1</i>   | <i>MPL</i>    | <i>KRAS</i>                                      |                      |                                |
| <i>MYC</i>                    | <i>NF1</i>    | <i>NFE2L2</i> | <i>NOTCH1</i> | <i>MET</i>                                       |                      |                                |
| <i>NPM1</i>                   | <i>NRAS</i>   | <i>NTRK1</i>  | <i>PDGFRA</i> | <i>MYC</i>                                       |                      |                                |
| <i>PIK3CA</i>                 | <i>PTEN</i>   | <i>PTPN11</i> | <i>RAF1</i>   | <i>PDGFRA</i>                                    |                      |                                |
| <i>RET</i>                    | <i>RHEB</i>   | <i>RHOA</i>   | <i>RIT1</i>   | <i>PIK3CA</i>                                    |                      |                                |
| <i>ROS1</i>                   | <i>SMAD4</i>  | <i>SMO</i>    | <i>SRC</i>    | <i>RAF1</i>                                      |                      |                                |
| <i>STK11</i>                  | <i>TERT</i>   | <i>TP53</i>   | <i>VHL</i>    | *Complete exon coverage for genes in <b>bold</b> |                      |                                |

**Supplemental Table 3: 70 gene panel (N = 1 patient)**

Only non-synonymous alterations were analyzed.

| Complete Exon Sequencing             |              |              |               |               |               |                                        |               |                      |                     |
|--------------------------------------|--------------|--------------|---------------|---------------|---------------|----------------------------------------|---------------|----------------------|---------------------|
| Point Mutations (SNVs)<br>(70 Genes) |              |              |               |               |               | Amplifications<br>(CNVs)<br>(18 Genes) |               | Fusions<br>(6 Genes) | Indels<br>(3 Genes) |
| <i>AKT1</i>                          | <i>ALK</i>   | <i>APC</i>   | <i>AR</i>     | <i>ARAF</i>   | <i>ARID1A</i> | <i>AR</i>                              | <i>BRAF</i>   | <i>ALK</i>           | <i>EGFR*</i>        |
| <i>ATM</i>                           | <i>BRAF</i>  | <i>BRCA1</i> | <i>BRCA2</i>  | <i>CCND1</i>  | <i>CCND2</i>  | <i>CCND1</i>                           | <i>CCND2</i>  | <i>FGFR2</i>         | <i>ERBB2*</i>       |
| <i>CCNE1</i>                         | <i>CDH1</i>  | <i>CDK4</i>  | <i>CDK6</i>   | <i>CDKN2A</i> | <i>CDKN2B</i> | <i>CCNE1</i>                           | <i>CDK4</i>   | <i>FGFR3</i>         | <i>MET**</i>        |
| <i>CTNNB1</i>                        | <i>EGFR</i>  | <i>ERBB2</i> | <i>ESR1</i>   | <i>EZH2</i>   | <i>FBXW7</i>  | <i>CDK6</i>                            | <i>EGFR</i>   | <i>NTRK1</i>         |                     |
| <i>FGFR1</i>                         | <i>FGFR2</i> | <i>FGFR3</i> | <i>GATA3</i>  | <i>GNA11</i>  | <i>GNAQ</i>   | <i>ERBB2</i>                           | <i>FGFR1</i>  | <i>RET</i>           |                     |
| <i>GNAS</i>                          | <i>HNF1A</i> | <i>HRAS</i>  | <i>IDH1</i>   | <i>IDH2</i>   | <i>JAK2</i>   | <i>FGFR2</i>                           | <i>KIT</i>    | <i>ROS1</i>          |                     |
| <i>JAK3</i>                          | <i>KIT</i>   | <i>KRAS</i>  | <i>MAP2K1</i> | <i>MAP2K2</i> | <i>MET</i>    | <i>KRAS</i>                            | <i>MET</i>    |                      |                     |
| <i>MLH1</i>                          | <i>MPL</i>   | <i>MYC</i>   | <i>NF1</i>    | <i>NFE2L2</i> | <i>NOTCH1</i> | <i>MYC</i>                             | <i>PDGFRA</i> |                      |                     |
| <i>NPM1</i>                          | <i>NRAS</i>  | <i>NTRK1</i> | <i>PDGFRA</i> | <i>PIK3CA</i> | <i>PTEN</i>   | <i>PIK3CA</i>                          | <i>RAF1</i>   |                      |                     |
| <i>PTPN11</i>                        | <i>RAF1</i>  | <i>RBI</i>   | <i>RET</i>    | <i>RHEB</i>   | <i>RHOA</i>   |                                        |               |                      | *exons 19 & 20      |
| <i>RIT1</i>                          | <i>ROS1</i>  | <i>SMAD4</i> | <i>SMO</i>    | <i>SRC</i>    | <i>STK11</i>  |                                        |               |                      | **exon 14 skipping  |
| <i>TERT</i>                          | <i>TP53</i>  | <i>TSC1</i>  | <i>VHL</i>    |               |               |                                        |               |                      |                     |

**Genes included on all three panel versions:** point mutations (SNVs) in *AKT1*, *ALK*, *APC*, *AR*, *ATM*, *BRAF*, *CDH1*, *CDKN2A*, *CTNNB1*, *EGFR*, *ERBB2*, *EZH2*, *FBXW7*, *FGFR1*, *FGFR2*, *FGFR3*, *GNA11*, *GNAQ*, *GNAS*, *HNF1A*, *HRAS*, *IDH1*, *IDH2*, *JAK2*, *JAK3*, *KIT*, *KRAS*, *MET*, *MLH1*, *MPL*, *MYC*, *NOTCH1*, *NPM1*, *NRAS*, *PDGFRA*, *PIK3CA*, *PTEN*, *PTPN11*, *RBI*, *RET*, *SMAD4*, *SMO*, *SRC*, *STK11*, *TERT*, *TP53*, and *VHL*; gene amplifications in *EGFR*, *ERBB2* (*HER2*), and *MET*. Fusions and indel mutations were assessed for only in the 48 patients evaluated by the 68-gene and 70-gene panel.

**Supplemental Table 4. List of all alterations identified by the ctDNA test (and tissue NGS) and examples of potential actionability\***

| 254 | All Alterations (non-synonymous) (ctDNA variant allele fraction %)                                                              | Functionally Characterized Alterations Only (ctDNA variant allele fraction %)                 | Examples of Potentially actionable alterations: Cognate drugs** | Tissue NGS Results***                                                                                                                                                                                                   |
|-----|---------------------------------------------------------------------------------------------------------------------------------|-----------------------------------------------------------------------------------------------|-----------------------------------------------------------------|-------------------------------------------------------------------------------------------------------------------------------------------------------------------------------------------------------------------------|
| 1   | EGFR T790M (2.9%), TP53 E258K (2.4%), EGFR E746_A750Del (0.3%), MET R191W (0.1%)                                                | EGFR T790M (2.9%), TP53 E258K (2.4%)                                                          | EGFR T790M: osimertinib                                         | EGFR amplification – equivocal⌘, EGFR E746_A750del, EGFR T790M, AKT2 amplification – equivocal⌘, FGFR4 amplification, GNAS amplification – equivocal⌘, CCNE1 amplification, MCL1 amplification – equivocal⌘, TP53 E258K |
| 2   | EGFR T790M (29.28%), TP53 C275S (8.61%), EGFR E746_A750Del (25.24%), EGFR Amplification, BRAF Amplification, CCNE Amplification | EGFR T790M (26.05%), TP53 C275S (8.03%), EGFR Exon 19 Del (25.26%), EGFR Amplification        | EGFR T790M: osimertinib<br>EGFR Amplification: erlotinib        | EGFR amplification, EGFR E746_A750del, EGFR T790M, CCND3 amplification, CDKN2A/B loss, TP53 C275S                                                                                                                       |
| 3   | EGFR L861Q (1.3%), TP53 V157F (1.2%), EGFR G719S (1.1%), TP53 R248G (0.9%), EGFR T790M (0.8%)                                   | EGFR L861Q (1.3%), TP53 V157F (1.2%), EGFR G719S (1.1%), TP53 R248G (0.9%), EGFR T790M (0.8%) | EGFR T790M: osimertinib                                         |                                                                                                                                                                                                                         |
| 4   | EGFR T790M (0.5%), TP53 R273H (0.4%)                                                                                            | EGFR T790M (0.5%)                                                                             | EGFR T790M: osimertinib                                         |                                                                                                                                                                                                                         |
| 5   | EGFR L858R (0.4%), EGFR S768I (0.2%), NOTCH1 A1338V (0.2%)                                                                      | EGFR L858R (0.4%), EGFR S768I (0.2%)                                                          | EGFR L858R: erlotinib                                           | EGFR L858R, EGFR S768I, TP53 R273H, FLT3 splice 1304_1309+1delTAAGAAG, LRP1B L2478*                                                                                                                                     |
| 6   | EGFR L858R (0.6%)<br>TP53 C135Y (0.8%),                                                                                         | EGFR L858R (0.6%)<br>TP53 C135Y (0.8%),                                                       | EGFR L858R; erlotinib                                           | EGFR L858R, ERBB3 amplification, CDK4 amplification, GLI1 amplification, TP53 C135Y, NFKBIA amplification, NKX2-1 amplification, ZNF217 amplification                                                                   |
| 7   | EGFR A743V (0.2%)                                                                                                               | EGFR A743V (0.2%)                                                                             | EGFR A743V: erlotinib                                           |                                                                                                                                                                                                                         |
| 8   | EGFR L858R (19.5%), ERBB2 S310F (15.6%), TP53 Y205C (6.9%)                                                                      | EGFR L858R (19.5%), ERBB2 S310F (15.6%), TP53 Y205C (6.9%)                                    | EGFR L858R; erlotinib<br>ERBB2 S310F: trastuzumab               | EGFR L858R, ERBB2 S310F, CCND3 amplification, CDKN2A/B loss, TP53 Y205C                                                                                                                                                 |

| 254 | All Alterations (non-synonymous) (ctDNA variant allele fraction %)                                                        | Functionally Characterized Alterations Only (ctDNA variant allele fraction %)   | Examples of Potentially actionable alterations: Cognate drugs** | Tissue NGS Results***                                                                                                                                                                                                                                                      |
|-----|---------------------------------------------------------------------------------------------------------------------------|---------------------------------------------------------------------------------|-----------------------------------------------------------------|----------------------------------------------------------------------------------------------------------------------------------------------------------------------------------------------------------------------------------------------------------------------------|
| 9   | TP53 R306* (8.1%), EGFR T790M (4.3%), EGFR Amplification                                                                  | TP53 R306* (8.1%), EGFR T790M (4.3%), EGFR Amplification (2.3%)                 | EGFR T790M: osimertinib                                         |                                                                                                                                                                                                                                                                            |
| 10  | EGFR T790M (1.8%), TP53 R273H (0.4%)                                                                                      | EGFR T790M (1.8%)                                                               | EGFR T790M: osimertinib                                         |                                                                                                                                                                                                                                                                            |
| 11  | EGFR E746_A750Del (2.5%), EGFR M881V (1.0%), EGFR Amplification, MET Amplification                                        | EGFR Exon 19 Del (2.5%), EGFR Amplification, MET Amplification                  | EGFR Amplification: cetuximab                                   | EGFR amplification, EGFR E746_A750del, NF1 splice site 3197+1G>A, AURKA amplification – equivocal, TP53 splice site 920-6_922delTCCTAGCAC, NKX2-1 amplification                                                                                                            |
| 12  | EGFR L747_E749Del (0.4%)                                                                                                  | EGFR L747_E749Del (0.4%)                                                        | EGFR L747_E749: erlotinib                                       | EGFR A750P, EGFR amplification, EGFR L747_A750>S, CCND1 amplification, CDKN2A/B loss, TP53 R248L, RICTOR amplification, BCL2L2 amplification, NFKBIA amplification, FGF3 amplification, FGF4 amplification, FGF10 amplification, FGF19 amplification, NKX2-1 amplification |
| 13  | EGFR L858R (14.4%), TP53 H168R (8.4%)                                                                                     | EGFR L858R (14.4%), TP53 H168R (8.4%)                                           | EGFR L858R: erlotinib                                           |                                                                                                                                                                                                                                                                            |
| 14  | EGFR Amplification<br>MET Amplification,                                                                                  | EGFR Amplification<br>MET Amplification,                                        | MET Amplification: crizotinib<br>EGFR Amplification: Cetuximab  |                                                                                                                                                                                                                                                                            |
| 15  | EGFR T790M (7.23%), BRAF Amplification, EGFR R932H (0.54%), EGFR Exon 19 Del (10.96%)                                     | EGFR T790M (7.23%), BRAF Amplification, EGFR Exon 19 Del (10.96%)               | EGFR T790M: osimertinib<br>BRAF Amplification: vemurafenib      |                                                                                                                                                                                                                                                                            |
| 16  | EGFR S752F (0.51%), RAF1 R627Q (0.23%), EGFR Exon 19 Del (0.42%)                                                          | EGFR Exon 19 Del (0.42%)                                                        | EGFR Exon 19 Del: erlotinib                                     |                                                                                                                                                                                                                                                                            |
| 17  | SMAD4 D493N (8.30%), EGFR S768I (5.35%), EGFR G719C (5.32%), ARID1A S744* (3.14%), CDKN2A S12L (0.84%), MYC Amplification | EGFR S768I (5.35%), EGFR G719C (5.32%), ARID1A S744* (3.14%), MYC Amplification | EGFR G719C: gefitinib                                           |                                                                                                                                                                                                                                                                            |

| <b>254</b> | <b>All Alterations (non-synonymous)<br/>(ctDNA variant allele fraction %)</b>                                                                                                                                                                                                     | <b>Functionally Characterized Alterations Only<br/>(ctDNA variant allele fraction %)</b>                                                                             | <b>Examples of Potentially actionable alterations:<br/>Cognate drugs**</b> | <b>Tissue NGS Results***</b>                                                               |
|------------|-----------------------------------------------------------------------------------------------------------------------------------------------------------------------------------------------------------------------------------------------------------------------------------|----------------------------------------------------------------------------------------------------------------------------------------------------------------------|----------------------------------------------------------------------------|--------------------------------------------------------------------------------------------|
| 18         | PIK3CA E542K (17.1%),<br>EGFR L861Q (10.9%),<br>EGFR amplification,<br>TP53 C238F (8.6%),<br>TP53 F113V (0.1%),<br>BRCA1 N1519S (2.1%),<br>MET T1307I (0.4%)                                                                                                                      | PIK3CA E542K (17.1%),<br>EGFR L861Q (10.9%),<br>EGFR amplification,<br>TP53 C238F (8.6%),<br>TP53 F113V (0.1%)                                                       | EGFR amplification:<br>cetuximab                                           |                                                                                            |
| 19         | NF1 L1411F (2.8%),<br>RIT1 F82C (1.6%),<br>TP53 S241F (0.6%),<br>KRAS Q22K (0.5%),<br>KRAS G12D (0.3%),<br>KRAS K5E (0.2%),<br>MAP2K2 K61E (0.3%),<br>MAP2K2 A62T (0.3%),<br>NRAS T58I (0.3%),<br>EGFR L747_P753<br>DelInsS (0.1%),<br>EGFR amplification,<br>FGFR1 amplification | TP53 S241F (0.6%),<br>KRAS Q22K (0.5%),<br>KRAS G12D (0.3%),<br>NRAS T58I (0.3%),<br>EGFR L747_P753 DelInsS<br>(0.1%),<br>EGFR amplification,<br>FGFR1 amplification | EGFR L747_P753<br>Del: erlotinib<br>FGFR1 amplification:<br>lenvatinib     |                                                                                            |
| 20         | EGFR L858R (16.3%),<br>EGFR T790M (2.5%),<br>EGFR amplification,<br>SRC P488L (1.3%),<br>APC L2401P (0.4%),<br>MET amplification                                                                                                                                                  | EGFR L858R (16.3%),<br>EGFR T790M (2.5%),<br>EGFR amplification,<br>MET amplification                                                                                | EGFR L858R:<br>erlotinib                                                   |                                                                                            |
| 21         | EGFR E746_A750 Del<br>(4.9%),<br>EGFR T790M (3.2%),<br>TP53 L130P (1.8%)                                                                                                                                                                                                          | EGFR E746_A750 Del<br>(4.9%),<br>EGFR T790M (3.2%),<br>TP53 L130P (1.8%)                                                                                             | EGFR T790M:<br>osimertinib                                                 |                                                                                            |
| 22         | EGFR P644L (1.0%),<br>TP53 G266E (0.3%)                                                                                                                                                                                                                                           | TP53 G266E (0.3 %)                                                                                                                                                   | TP53 G266E: WEE1<br>inhibitor AZD1775                                      | BRCA2 deletion exons 11-<br>16,<br>TP53 G266E                                              |
| 23         | EGFR C535R (0.13%),<br>FGFR2 A315T (0.11%)                                                                                                                                                                                                                                        | FGFR2 A315T (0.11%)                                                                                                                                                  | FGFR2 A315T:<br>lenvatinib                                                 |                                                                                            |
| 24         | EGFR D612D (0.2%)<br>NF1 F1261Y (0.6%),                                                                                                                                                                                                                                           | None characterized                                                                                                                                                   |                                                                            | KRAS amplification,<br>KRAS G12C,<br>TP53 R65*                                             |
| 25         | TP53 S241F (0.9%)                                                                                                                                                                                                                                                                 | TP53 S241F (0.9%)                                                                                                                                                    | TP53 S241: WEE1<br>inhibitor AZ1775                                        | RB1 S834*,<br>MLL2 Q3623fs*52                                                              |
| 26         | VHL S80G (0.41%)                                                                                                                                                                                                                                                                  | None characterized                                                                                                                                                   |                                                                            | EGFR G719A,<br>:EGFR L861Q,<br>MDM2 amplification, CDK4<br>amplification, GRIN2A<br>R1022C |
| 27         | NOTCH1 V1599M (0.3%)                                                                                                                                                                                                                                                              | NOTCH1 V1599M (0.3%)                                                                                                                                                 | NOTCH1 V1599M<br>LY3039478 (notch<br>inhibitor)                            |                                                                                            |
| 28         | ALK S319C (0.2%),<br>MET C95F (0.2%),<br>SMAD4 D332N (0.1%)                                                                                                                                                                                                                       | None characterized                                                                                                                                                   |                                                                            |                                                                                            |

| 254 | All Alterations (non-synonymous) (ctDNA variant allele fraction %) | Functionally Characterized Alterations Only (ctDNA variant allele fraction %) | Examples of Potentially actionable alterations: Cognate drugs** | Tissue NGS Results***                                                                                                                        |
|-----|--------------------------------------------------------------------|-------------------------------------------------------------------------------|-----------------------------------------------------------------|----------------------------------------------------------------------------------------------------------------------------------------------|
| 29  | TP53 V143M (1.3%)                                                  | TP53 V143M (1.3%)                                                             | TP53 V143M: WEE1 inhibitor AZD1775                              | RET CCDC6-RET fusion, TP53 V143M, CDKN2A/B loss, TNFAIP3 splice site 1907-2A>C                                                               |
| 30  | RB1 D878N (0.2%), MYC E431K (0.2%)                                 | None characterized                                                            |                                                                 |                                                                                                                                              |
| 31  | TP53 Y205C (0.1%)                                                  | TP53 Y205C (0.1%)                                                             | TP53 Y205C: WEE1 inhibitor AZD1775                              | EGFR L858R, ERBB3 amplification, MDM2 amplification, ARID1A Q1334_R1335insQ, E MSY amplification, NFKBIA amplification, NKX2-1 amplification |
| 32  | NOTCH1 L2368M (0.6%)                                               | None characterized                                                            |                                                                 | EGFR E746_A750del, MYC amplification – equivocal <sup>⊗</sup> , TP53 D391fs*3+                                                               |
| 33  | PIK3CA N331K (2.49%)                                               | None characterized                                                            |                                                                 |                                                                                                                                              |
| 34  | KRAS G12C (11.5%), TP53 G154V (0.8%)                               | KRAS G12C (11.5%), TP53 G154V (0.8%)                                          | KRAS G12C: Trametinib                                           |                                                                                                                                              |
| 35  | TP53 G145C (2.4%), ERBB4 D300N (0.7%), MET amplification           | TP53 G145C (2.4%), MET amplification                                          | MET amplification: crizotinib                                   |                                                                                                                                              |
| 36  | AR L393P (1.2%)                                                    | None characterized                                                            |                                                                 |                                                                                                                                              |
| 37  | MLH1 Y379C (0.4%), TP53 R273L (0.3%), ALK EML4- ALK fusion (0.2%)  | TP53 R273L (0.3%), ALK EML4- ALK fusion (0.2%)                                | EML4- ALK fusion: crizotinib                                    |                                                                                                                                              |
| 38  | KRAS G12C (40.9%), MET M1211L (4.2%), MET N1288H (3.9%)            | KRAS G12C (40.9%)                                                             | KRAS G12C: trametinib                                           |                                                                                                                                              |
| 39  | KIT N828D (0.5%), MET N393S (0.4%)                                 | None characterized                                                            |                                                                 | PIK3CA H1047R, IKBKE amplification - equivocal, ARID1A K1677*, MDM4 amplification - equivocal                                                |
| 40  | MET C385Y (3.2%), TP53 V216L (0.3%), ALK N1583S (0.2%)             | TP53 V216L (0.3%)                                                             | TP53 V216L: WEE1 inhibitor AZD177                               |                                                                                                                                              |
| 41  | MYC F38L (0.3%), PIK3CA C901Y (0.2%)                               | None characterized                                                            |                                                                 | CCND3 P203S-subclonal, CDKN2A p16INK4a R58 and p14ARF P72L, TP53 loss exons 10-11, RET truncation intron 11                                  |
| 42  | TP53 G245S (1.0 %)                                                 | TP53 G245S (1.0%)                                                             | TP53 G245S: WEE1 inhibitor AZD1775                              |                                                                                                                                              |

| 254 | All Alterations (non-synonymous) (ctDNA variant allele fraction %)                                                                                            | Functionally Characterized Alterations Only (ctDNA variant allele fraction %) | Examples of Potentially actionable alterations: Cognate drugs** | Tissue NGS Results***                                                                                                         |
|-----|---------------------------------------------------------------------------------------------------------------------------------------------------------------|-------------------------------------------------------------------------------|-----------------------------------------------------------------|-------------------------------------------------------------------------------------------------------------------------------|
| 43  | TP53 R248W (3.9%), NOTCH1 A1323S (0.6%), KRAS G12C (0.3%)                                                                                                     | TP53 R248W (3.9%), KRAS G12C (0.3%)                                           | KRAS G12C: trametinib                                           | KRAS G12C, NF1 splice site 3198-1G>T, CDK4 amplification, NTRK3 D565H, TP53 G245V, GATA6 amplification-equivocal, LRP1B E1360 |
| 44  | ERBB2 C504Y (0.2%)                                                                                                                                            | None characterized                                                            |                                                                 |                                                                                                                               |
| 45  | TP53 C275F (9.9%), KRAS G12A (9.6%)                                                                                                                           | TP53 C275F (9.9%), KRAS G12A (9.6%)                                           | KRAS G12A: trametinib                                           | HGF amplification-equivocal, KRAS G12A, TP53 C275F, BCOL1 Y1692, EP300 splice site 3672-2insCTTA                              |
| 46  | TP53 C277Y (1.6%)                                                                                                                                             | None characterized                                                            |                                                                 |                                                                                                                               |
| 47  | ALK A585T (8.7%)                                                                                                                                              | None characterized                                                            |                                                                 |                                                                                                                               |
| 48  | TP53 P190R (0.5%), JAK2 V617F (0.4%), TP53 Y163C (0.1%)                                                                                                       | TP53 P190R (0.5%), JAK2 V617F (0.4%), TP53 Y163C (0.1%)                       | JAK2 V617F: ruxolitinib                                         |                                                                                                                               |
| 49  | TP53 E298* (8.0%), TP53 G245C (0.2%), TP53 R282W (0.1%), FGFR2 D602G (0.3%), BRAF amplification                                                               | TP53 E298* (8.0%), TP53 G245C (0.2%), TP53 R282W (0.1%), BRAF amplification   | BRAF amplification: vemurafenib                                 | STK11 A76fs*20, MAP2K1 C121S, TP53 E298*, FAM123B R199S                                                                       |
| 50  | MAP2K1 K57N (3.01%), TP53 V203L (2.88%)                                                                                                                       | MAP2K1 K57N (3.01%), TP53 V203L (2.88%)                                       | MAP2K1 K57N: trametinib                                         | MAP2K1 K57N, MCL1 amplification – equivocal, TP53 V203L                                                                       |
| 51  | TP53 E294* (23.89%), BRAF D594N (23.01%), TP53 R273H (18.36%), RHOA A44L (0.79%), RHOA A15D (0.62%), RHOA Y42C (0.28%), TP53 S33Y (0.25%), KRAS Amplification | TP53 E294* (23.89%), RHOA A44L (0.79%), TP53 S33Y (0.25%), KRAS Amplification | KRAS Amplification: trametinib                                  |                                                                                                                               |
| 52  | KRAS G12V (10.57%), BRCA2 R329S (5.82%), PDGFRA E279D (3.36%), NF1 R2269C (0.34%)                                                                             | KRAS G12V (10.57%), PDGFRA E279D (3.36%)                                      | PDGFRA E279D: pazopanib                                         | KRAS G12V                                                                                                                     |
| 53  | KRAS G12C (2.46%), PDGFRA L534P (2.17%), ROS1 E1763K (0.83%), NFE2L2 Q26H (0.79%), ERBB2 H495Y (0.50%),                                                       | KRAS G12C (2.46%), CTNNB1 S33C (0.43%)                                        | KRAS G12C: trametinib                                           |                                                                                                                               |



| 254 | All Alterations (non-synonymous) (ctDNA variant allele fraction %)                                                                                | Functionally Characterized Alterations Only (ctDNA variant allele fraction %)                          | Examples of Potentially actionable alterations: Cognate drugs**                                                 | Tissue NGS Results***                                                                                                                            |
|-----|---------------------------------------------------------------------------------------------------------------------------------------------------|--------------------------------------------------------------------------------------------------------|-----------------------------------------------------------------------------------------------------------------|--------------------------------------------------------------------------------------------------------------------------------------------------|
|     | ARID1A S1791L (0.50%), CTNNB1 S33C (0.43%), MAP2K1 R96K (0.25%), NFE2L2 R34Q (0.25%), NF1 N390K (0.19%), RAF1 R627W (0.17%), MAP2K1 V1171 (0.13%) |                                                                                                        |                                                                                                                 |                                                                                                                                                  |
| 54  | TP53 Y163C (11.26%), MET Amplification                                                                                                            | TP53 Y163C (11.26%), MET Amplification                                                                 | MET Amplification: crizotinib                                                                                   |                                                                                                                                                  |
| 55  | SMAD4 R361C (1.44%), NF1 I1641T (0.65%)                                                                                                           | None characterized                                                                                     |                                                                                                                 | MAP3K1 R306H, SMAD4 R361C                                                                                                                        |
| 56  | TP53 E271K (26.62%), TP53 C277Y (6.63%), TP53 H179Q (0.34%), FGFR2 M735I (0.23%), KIT Amplification, PIK3CA Amplification, PDGFRA Amplification   | TP53 E271K (26.62%), TP53 H179Q (0.34%), KIT Amplification, PIK3CA Amplification, PDGFRA Amplification | KIT Amplification: sorafenib<br>PIK3CA amplification: everolimus<br>PDGFRA amplification: pazopanib, olaratumab |                                                                                                                                                  |
| 57  | BRCA2 A1991T (0.23%), ERBB2 A390T (0.13%)                                                                                                         | None characterized                                                                                     |                                                                                                                 |                                                                                                                                                  |
| 58  | SMAD4 R496C (0.40%), TP53 V143M (0.32%), NOTCH1 H2092Y (0.21%)                                                                                    | TP53 V143M (0.32%)                                                                                     | TP53 V143M: WEE1 inhibitor AZD1775                                                                              |                                                                                                                                                  |
| 59  | ARID1A Q708* (1.54%), KRAS G13D (0.91%), TP53 S94* (0.49%), RHOA R5W (0.28%), BRCA1 H1284Y (0.22%)                                                | ARID1A Q708* (1.54%), KRAS G13D (0.91%), TP53 S94* (0.49%)                                             | KRAS G13D: trametinib                                                                                           | KRAS G13D, TET2 S657*, MYC amplification, TP53 S94*, XPO1 Q916E, ARID1A Q708*                                                                    |
| 60  | TP53 R273H (1.07%)                                                                                                                                | None characterized                                                                                     |                                                                                                                 |                                                                                                                                                  |
| 61  | RET R693H (0.60%), SMAD4 G89R (0.24%), TP53 Y220C (0.11%), EML4 -ALK (4.74%)                                                                      | TP53 Y220C (0.11%), EML4 -ALK (4.74%)                                                                  | EML4 -ALK: crizotinib                                                                                           |                                                                                                                                                  |
| 62  | KRAS G12V (12.8%), BRAF amplification, CDK6 amplification                                                                                         | KRAS G12V (12.8%), BRAF amplification, CDK6 amplification                                              | BRAF amplification: vemurafenib                                                                                 | KRAS G12V, PALB2 K862fs*22, NTRK1 amplification – equivocal⌘, EP300 Q884fs*73, LRP1B S4216*                                                      |
| 63  | KRAS G12C (1.1%), PIK3CA Q705H (0.8%)                                                                                                             | KRAS G12C (1.1%)                                                                                       | KRAS G12C: trametinib                                                                                           | AKT3 amplification – equivocal⌘, CCND1 amplification – equivocal⌘, KRAS G12C, FGF19 amplification – equivocal⌘, FGF4 amplification – equivocal⌘, |

| 254 | All Alterations (non-synonymous) (ctDNA variant allele fraction %)                                                                                                                                                                                                                                                                                                                                                                  | Functionally Characterized Alterations Only (ctDNA variant allele fraction %)                                                | Examples of Potentially actionable alterations: Cognate drugs** | Tissue NGS Results***                                                  |
|-----|-------------------------------------------------------------------------------------------------------------------------------------------------------------------------------------------------------------------------------------------------------------------------------------------------------------------------------------------------------------------------------------------------------------------------------------|------------------------------------------------------------------------------------------------------------------------------|-----------------------------------------------------------------|------------------------------------------------------------------------|
|     |                                                                                                                                                                                                                                                                                                                                                                                                                                     |                                                                                                                              |                                                                 | MCL1 amplification, MYC amplification, FGF3 amplification – equivocal⌘ |
| 64  | ROS1 S1793* (0.2%)                                                                                                                                                                                                                                                                                                                                                                                                                  | None characterized                                                                                                           |                                                                 | BRAF V600E, DNMT3A R882H, TP53 D281Y – subclonal⌘, TP53 Q331*          |
| 65  | TP53 R158L (4.4%), KRAS G12C (3.0%), CDKN2A G35V (2.5%), PDGFRA V82M (1.1%)                                                                                                                                                                                                                                                                                                                                                         | TP53 R158L (4.4%), KRAS G12C (3.0%)                                                                                          | KRAS G12C: trametinib                                           |                                                                        |
| 66  | MET H61N (11.0%), MET amplification, TP53 Y126C (2.5%), TP53 R175H (1.0%), TP53 R283P (0.2%), TP53 P128R (0.1%), CCND1 Y226* (0.6%), NF1 G2001V (0.5%), ARID1A E2246* (0.5%), IDH2 R140Q (0.3%)                                                                                                                                                                                                                                     | MET amplification, TP53 Y126C (2.5%), TP53 R175H (1.0%), TP53 R283P (0.2%), IDH2 R140Q (0.3%)                                | MET amplification: crizotinib                                   |                                                                        |
| 67  | AR A331T (0.3%), ALK S1427F (0.1%)                                                                                                                                                                                                                                                                                                                                                                                                  | None characterized                                                                                                           |                                                                 |                                                                        |
| 68  | PTEN M134I (0.4%)                                                                                                                                                                                                                                                                                                                                                                                                                   | None characterized                                                                                                           |                                                                 |                                                                        |
| 69  | SMAD4 Q183* (7.7%), SMAD4 A451T (0.1%), BRCA2 S1855L (7.5%), BRCA2 D2242H (2.0%), BRCA2 E2355K (0.4%), MET S960L (6.7%), ROS1 CD74- ROS1 fusion (5.1%), TP53 Q331* (3.3%), TP53 Q192* (3.2%), TP53 S241C (1.3%), TP53 S215I (0.5%), TP53 E286K (0.2%), APC E40K (2.0%), APC R2560Q (0.4%), APC E1880K (0.4%), APC S2146L (0.2%), FGFR1 D674N (1.1%), FGFR1 V396I (0.5%), FGFR1 K542N (0.2%), ARID1A E1779D (0.3%), ATM L348F (0.2%) | ROS1 CD74- ROS1 fusion (5.1%), TP53 Q331* (3.3%), TP53 Q192* (3.2%), TP53 S241C (1.3%), TP53 S215I (0.5%), TP53 E286K (0.2%) | ROS1 CD74- ROS1 fusion: crizotinib                              |                                                                        |
| 70  | TP53 L145P (0.5%), TP53 H179Y (0.4%), TP53 R282W (0.1%),                                                                                                                                                                                                                                                                                                                                                                            | TP53 L145P (0.5%), TP53 H179Y (0.4%), TP53 R282W (0.1%)                                                                      | TP53 L145P: WEE1 inhibitor AZ1775; anti-angiogenesis agents     |                                                                        |

| <b>254</b> | <b>All Alterations (non-synonymous)<br/>(ctDNA variant allele fraction %)</b> | <b>Functionally Characterized Alterations Only<br/>(ctDNA variant allele fraction %)</b> | <b>Examples of Potentially actionable alterations:<br/>Cognate drugs**</b> | <b>Tissue NGS Results***</b> |
|------------|-------------------------------------------------------------------------------|------------------------------------------------------------------------------------------|----------------------------------------------------------------------------|------------------------------|
|            | AR E654K (0.1%)                                                               |                                                                                          |                                                                            |                              |
| 71         | TP53 E62* (0.5%),<br>TP53 R175H (0.3%)                                        | TP53 E62* (0.5%),<br>TP53 R175H (0.3%)                                                   | TP53 L145P: WEE1 inhibitor AZ1775; anti-angiogenesis agents                |                              |
| 72         | CTNNB1 S45F (12.2%),<br>MYC amplification,<br>CCNE1 amplification             | CTNNB1 S45F (12.2%),<br>MYC amplification,<br>CCNE1 amplification                        | MYC amplification:<br>BET inhibitor<br>GSK525762                           |                              |

\*Seventy-two of 88 patients had at least one alteration detected.

\*\*Examples of potentially actionable alterations are given. Additional alterations may also be theoretically actionable. (DGIdb - Mining the Druggable Genome: <http://dgidb.genome.wustl.edu>)

\*\*\*Additional non-NGS genomic tests may have been done, but their results are not listed here.

**Supplemental Table 5. *EGFR* alterations: Concordance between ctDNA and tissue testing**

|                                         | Overall concordance** |     |           |               | Concordance for patients with tissue biopsy to blood draw time interval $\leq$ median <sup>a,b</sup> |     |           |               | Concordance for patients with tissue biopsy to blood draw time interval $>$ median <sup>a,b</sup> |     |           |               | P-value* ( $\leq$ versus $>$ median) |
|-----------------------------------------|-----------------------|-----|-----------|---------------|------------------------------------------------------------------------------------------------------|-----|-----------|---------------|---------------------------------------------------------------------------------------------------|-----|-----------|---------------|--------------------------------------|
|                                         | (-)                   | (+) | Overall % | Kappa (SE)    | (-)                                                                                                  | (+) | Overall % | Kappa (SE)    | (-)                                                                                               | (+) | Overall % | Kappa (SE)    |                                      |
| <b><i>N=34 patients<sup>a</sup></i></b> | N=19                  | N=7 | 76.5%     | 0.471 (0.155) | N=13                                                                                                 | N=2 | 88.2%     | 0.605 (0.241) | N=6                                                                                               | N=5 | 64.7%     | 0.301 (0.224) | 0.22                                 |
| <b><i>N=26 patients<sup>b</sup></i></b> | N=14                  | N=7 | 80.8%     | 0.586 (0.165) | N=11                                                                                                 | N=2 | 100%      | 1.0 (0.0)     | N=3                                                                                               | N=5 | 61.5%     | 0.217 (0.269) | 0.04                                 |

Negative concordance (-): alteration was not detected in both tests. Positive concordance (+): alteration was detected in both tests. Overall concordance percentages included negative and positive concordant cases, i.e. when both the tissue and the ctDNA were negative or positive. Kappa values range from  $\kappa = 1$  (perfect agreement) to  $\kappa = 0$  (no agreement other than would be expected by chance). We included patients with *EGFR* alterations that were common in both the ctDNA and tissue gene panels. SE=Standard Error.

<sup>a</sup>Thirty-four patients had both ctDNA and a common tissue molecular test. For these N=34 patients, the median time interval between tissue biopsy to blood draw was 0.8 months.

<sup>b</sup>Twenty-six patients had both ctDNA and a common tissue molecular test, and had alterations in their ctDNA. (Patients with no alterations in their ctDNA were excluded). For these N=26 patients, the median time interval between tissue biopsy to blood draw was 1.0 month. (We performed this analysis excluding patients that had “no alterations detected” as it could be because no ctDNA was detected in the plasma).

\* 2-sided Chi-Square test, compares the % of overall concordance between patients with biopsy interval time  $\leq$  or  $>$  median.

\*\* All patients who were considered positively concordant had at least one identical *EGFR* mutation in the blood and tissue (see also **Supplemental Table 6**).

**Supplemental Table 6: Patients with at least one concordant EGFR alteration on ctDNA and tissue NGS analysis\***

| #  | Guardant ctDNA NGS Results                                                                                                                 | Foundation Medicine Tissue NGS                                                                                                                                                                                                                                             |
|----|--------------------------------------------------------------------------------------------------------------------------------------------|----------------------------------------------------------------------------------------------------------------------------------------------------------------------------------------------------------------------------------------------------------------------------|
| 1  | EGFR T790M 2.9%, TP53 E258K 2.4%, EGFR A750E 0.3%, MET R191W 0.1%                                                                          | EGFR T790M, EGFR amplification – equivocal, EGFR E746_A750del, AKT2 amplification – equivocal, FGFR4 amplification, GNAS amplification – equivocal, CCNE1 amplification, MCL1 amplification – equivocal, TP53 E258K                                                        |
| 2  | EGFR T790M 29.28%, TP53 C275S 8.61%, EGFR A750E 1.12%, EGFR Exon 19 Del 25.24%, EGFR Amplification, BRAF Amplification, CCNE Amplification | EGFR T790M, EGFR amplification, EGFR E746_A750del, CCND3 amplification, CDKN2A/B loss, TP53 C275S                                                                                                                                                                          |
| 5  | EGFR L858R 0.4%, EGFR S768I 0.2%, NOTCH1 A1338V 0.2%                                                                                       | EGFR L858R, EGFR S768I, TP53 R273H, FLT3 splice 1304_1309+1delTAAGAAG, LRP1B L2478*                                                                                                                                                                                        |
| 6  | EGFR L858R 0.6%, TP53 C135Y 0.8%                                                                                                           | EGFR L858R, ERBB3 amplification, CDK4 amplification, GLI1 amplification, TP53 C135Y, NFKBIA amplification, NKX2-1 amplification, ZNF217 amplification                                                                                                                      |
| 8  | EGFR L858R 19.5%, ERBB2 S310F 15.6%, TP53 Y205C 6.9%                                                                                       | EGFR L858R, ERBB2 S310F, CCND3 amplification, CDKN2A/B loss, TP53 Y205C                                                                                                                                                                                                    |
| 11 | EGFR E746K 2.5%, EGFR M881V 1.0%, EGFR Amplification 8.5, MET Amplification 2.3                                                            | EGFR E746_A750del, EGFR amplification, NF1 splice site 3197+1G>A, AURKA Amplification – equivocal, TP53 splice site 920-6_922delTCCTAGCAC, NKX2-1 amplification                                                                                                            |
| 12 | EGFR L747_E749Del 0.4%                                                                                                                     | EGFR L747_A750>S, EGFR A750P, EGFR amplification, CCND1 amplification, CDKN2A/B loss, TP53 R248L, RICTOR amplification, BCL2L2 amplification, NFKBIA amplification, FGF3 amplification, FGF4 amplification, FGF10 amplification, FGF19 amplification, NKX2-1 amplification |

\*Additional non-NGS genomic tests may have been done in these or other patients, but their results are not listed here.

## Supplemental Figure 1. Response evaluation and data availability

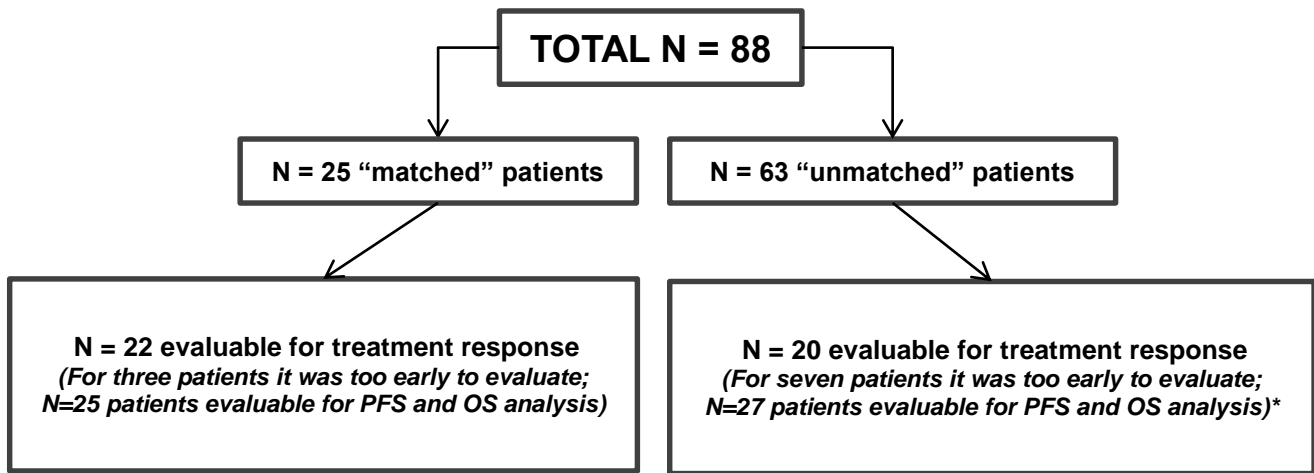

\*The main reasons for the remaining unmatched patients not being evaluable were as follows: not treated yet, died, were too advanced to be treated or were loss to follow up prior to ctDNA results. Abbreviations: OS, Overall survival; PFS, Progression-free survival.
